# Supplementary material for: Effects of a Buried Cysteine-To-Serine Mutation on Yeast Triosephosphate Isomerase Structure and Stability
Source: Int J Mol Sci. 2012 Aug 10;13(8):10010–21. doi: 10.3390/ijms130810010 (PMC3431843; doi:10.3390/ijms130810010)

# Effects of a Buried Cysteine-To-Serine Mutation on Yeast Triosephosphate Isomerase Structure and Stability

## Supplementary Information

**Figure S1.** Structural superposition of triosephosphate isomerases from *Plasmodium falciparum*. (A) Wild-type enzyme without ligand (1YDV, light blue), wild type enzyme with ligand (2VFI, dark blue), C126S mutant with ligand (3PVF, gold) and C126S mutant without ligand (3PY2, green); (B) Close-up view of the monomer A that shows the main differences between them.

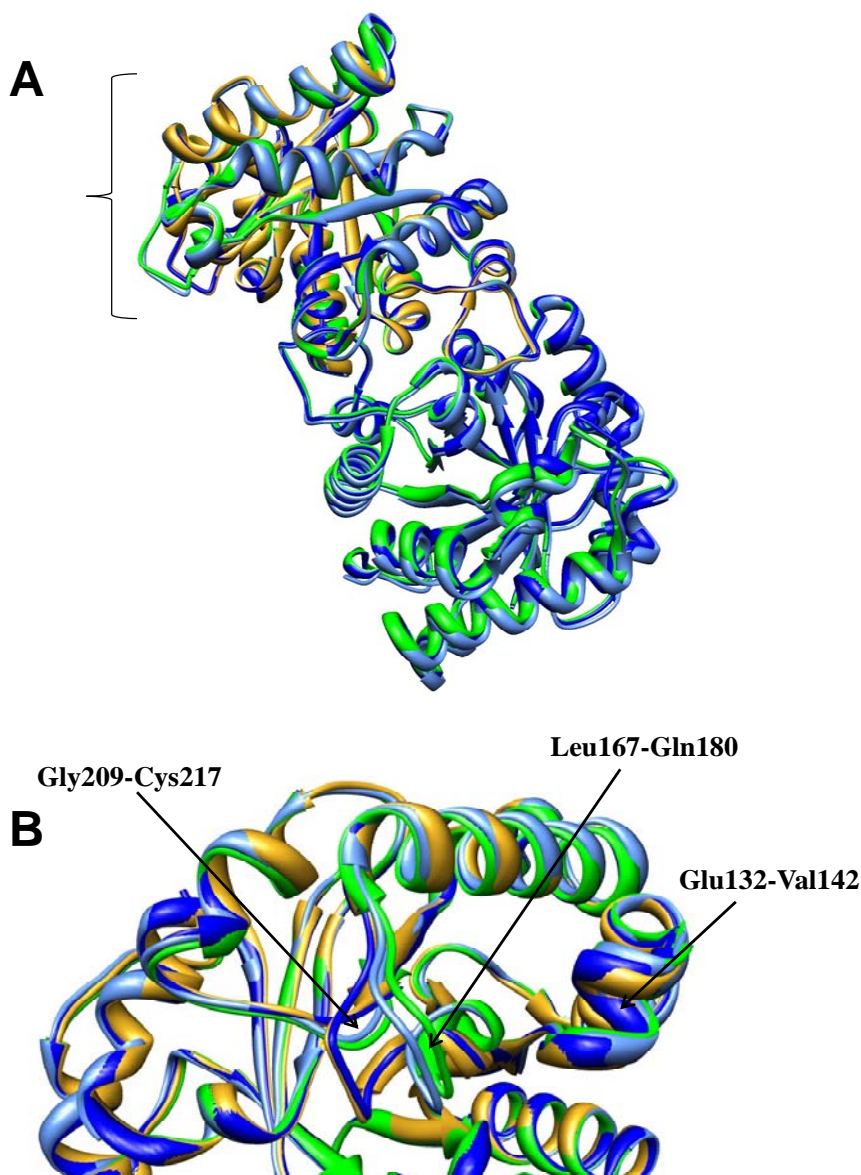

**Figure S2.** Superposition of the region containing the mutation C126S in the triosephosphate isomerases from *Saccharomyces cerevisiae* (light blue) and *Plasmodium falciparum* (gold). The orientation of Ser126 is the same in both structures. Side chains for residues in the 132–142 region are shown in both structures.

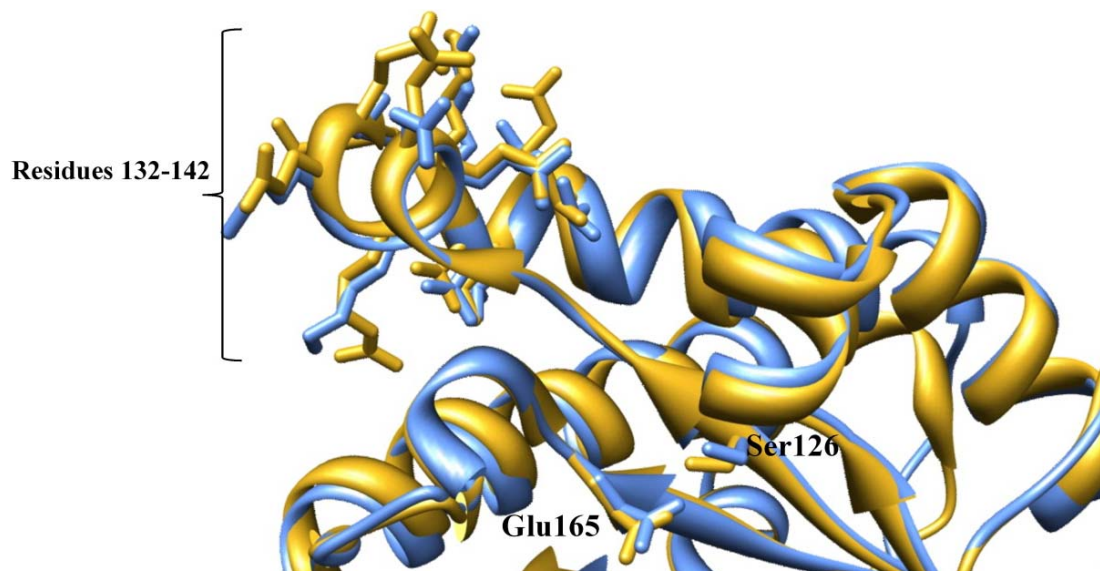

Supplement: Supplementary file 1 [file ijms-13-10010-s001.pdf]
